# Supplementary material for: Unlocking the genomic landscape for antimicrobial domain discovery with a two-stage progressive residue-level annotation model
Source: Research Square preprint supplement (doi:10.21203/rs.3.rs-8208819/v1), 2025-12-11
Supplement: Supplementary file 1 [file 246c933dce7625cf87a47fc1.docx]

**SUPPLEMENTARY MATERIALS**

**Table S1. The Hyperparameters for RegionAMP**

**Figure S1. CRF decoder outputs with the true antimicrobial regions**

**Figure S2. Sequence and residue label statistics**

**Table S1. The Hyperparameters for RegionAMP**

| **Hyperparameters** | **Search space** | **Best hyperparameters** |
| --- | --- | --- |
| **crf_head_lr_multiplier** | **{2.0, 5.0,10.0,20.0}** | **10.0** |
| **num_train_epochs** | **{10,15,20,25,30}** | **15** |
| **per_device_train_batch_size** | **{4,8,16,32}** | **8** |
| **weight_decay** | **{0.1,0.01,0.001}** | **0.01** |
| **Learning rate** | **{1e-3,1e-4,1e-5,2e-5,1e-6}** | **2e-5** |

**Figure S1. CRF decoder outputs with the true antimicrobial regions**

**
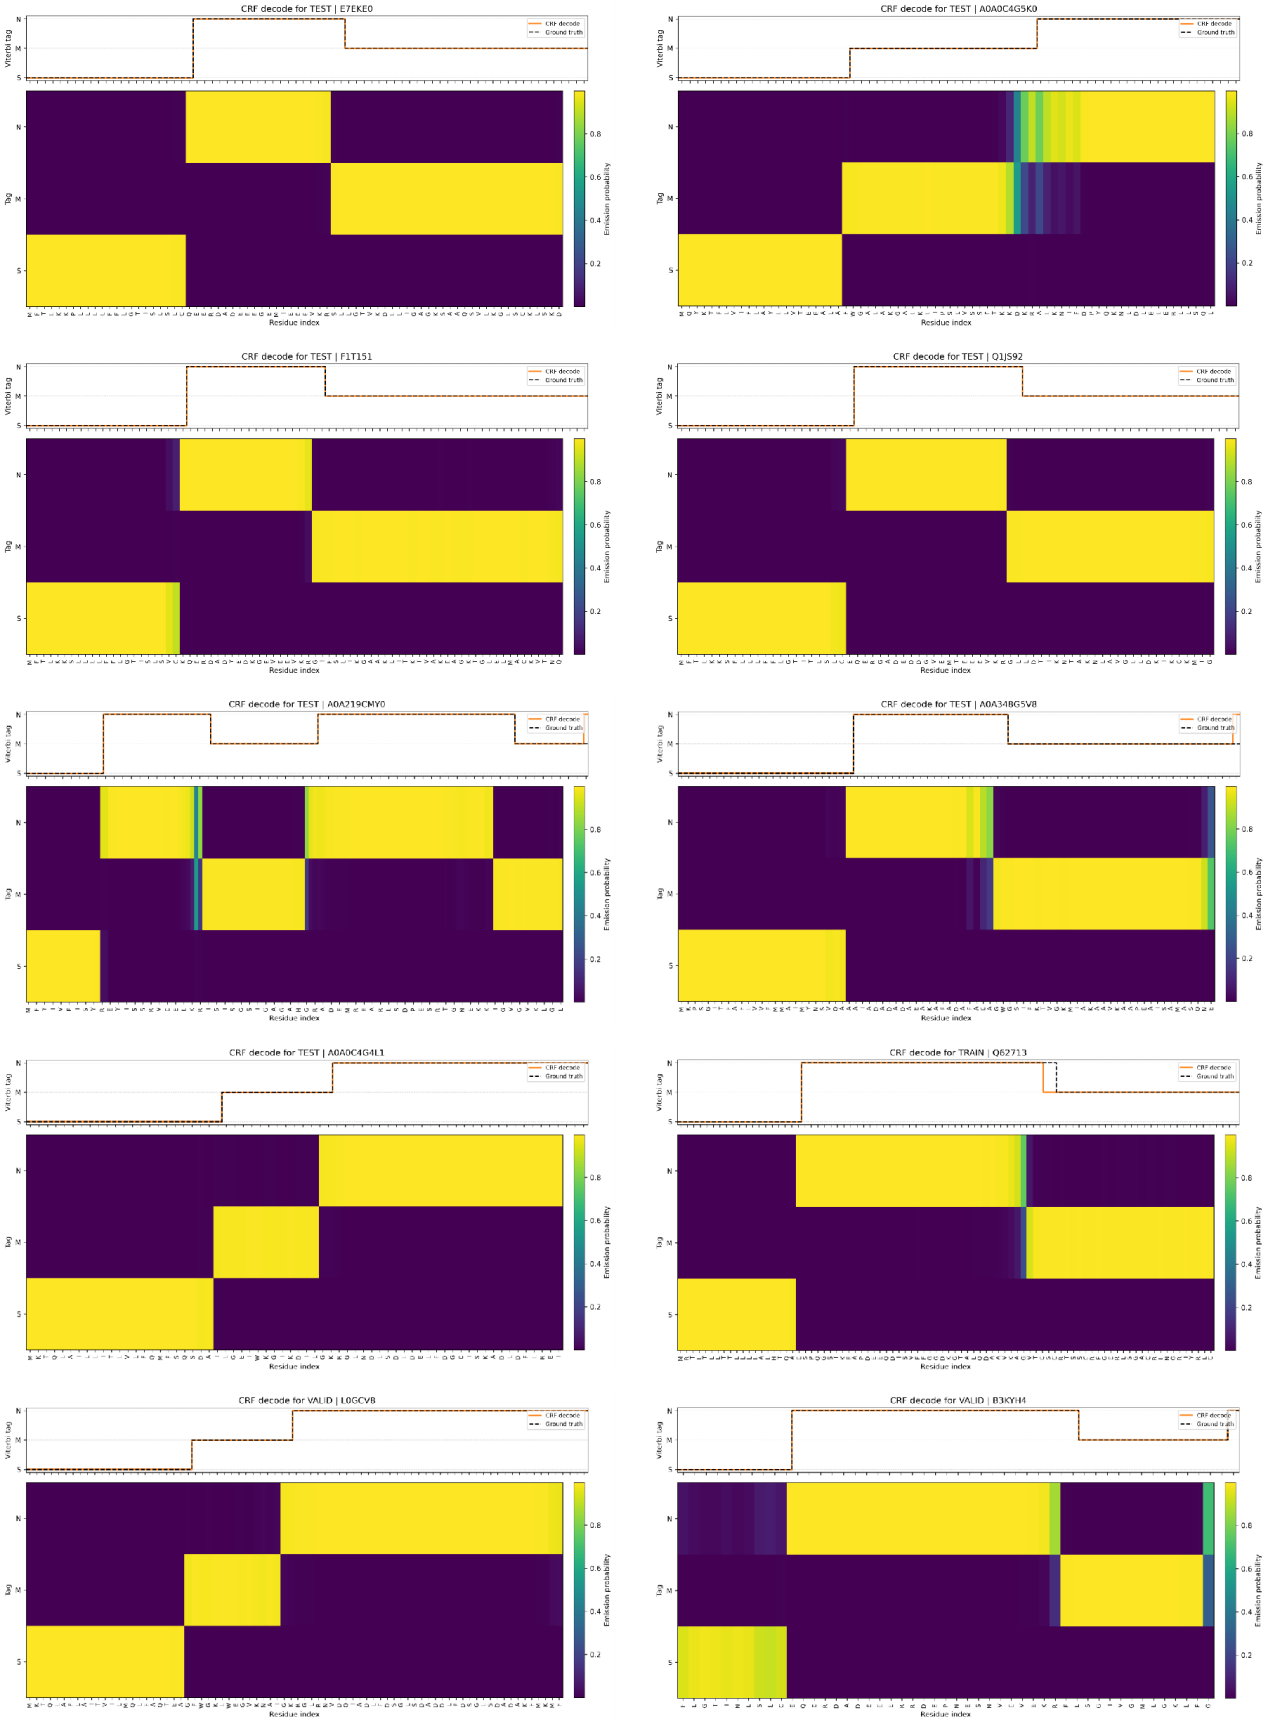
FigureS2. Sequence and residue label statistics**

**
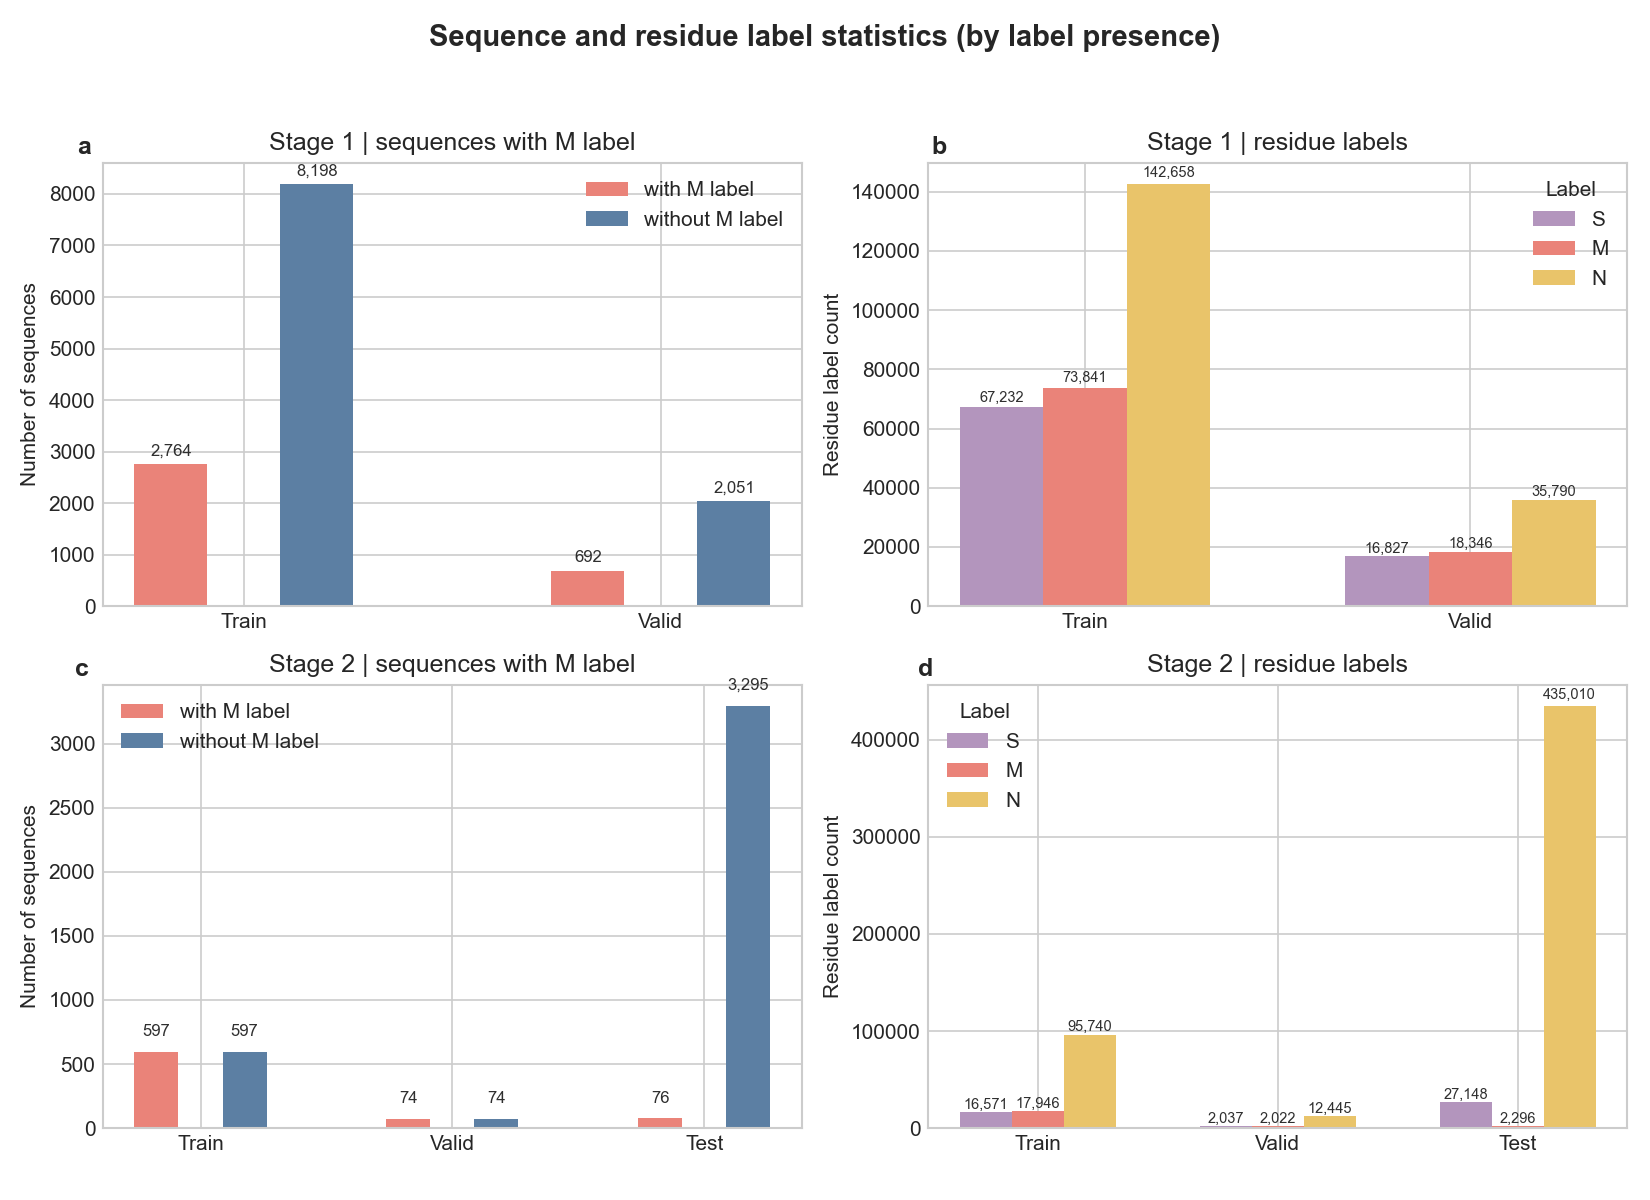
**
